# Supplementary material for: Synthesis of surface dual-template molecularly imprinted silica nanoparticles for extraction of ciprofloxacin and norfloxacin
Source: Royal Society of Chemistry journal article supplement (doi:10.1039/d2nj04429c), 2022-01-01
Supplement: d2nj04429c1.pdf [file d2nj04429c1.pdf]

## Supplementary Materials

### Synthesis of Surface Dual-template molecularly imprinted silica nanoparticles for extraction of Ciprofloxacin and Norfloxacin

Farideh Maleki<sup>a</sup>, Ali Daneshfar<sup>\*a,b</sup>

E-mail: daneshfara@yahoo.com; a.daneshfar@mail.ilam.ac.ir

<sup>a</sup>Department of Chemistry, Faculty of Science, Ilam University, Ilam, Iran

<sup>b</sup>present address: Department of Chemistry, Faculty of Science, Lorestan University, Khoramaabad,

Iran

\*Corresponding Author

#### Table of contents in Supporting Information:

1. **Figure (S1)** N<sub>2</sub> adsorption/desorption isotherm of GQDs@MI-SiNPs.
2. **Figure (S2)** Pareto chart of the main effects
3. **Figure (S3)** Normal probability plot of residuals for the extraction of target analytes
4. **Figure (S4)** 3D plots of significant factors (X<sub>1</sub>: amount of sorbent (mg), X<sub>2</sub>: eluent volume (μL), and X<sub>3</sub>: desorption time (min)).
5. **Figure (S5)** Profiles for predicted values and desirability function.
6. **Figure (S6)** Selectivity of GQDs@MI-SiNPs and GQDs@NI-SiNPs
7. **Table (S1)** The Box-Behnken design, the levels of the 3 factors and the analytical response Values
8. **Table (S2)** The results of the analysis of variance and regression
9. **Table (S3)** Results from the determination of intra- and inter-day RSDs and accuracy.

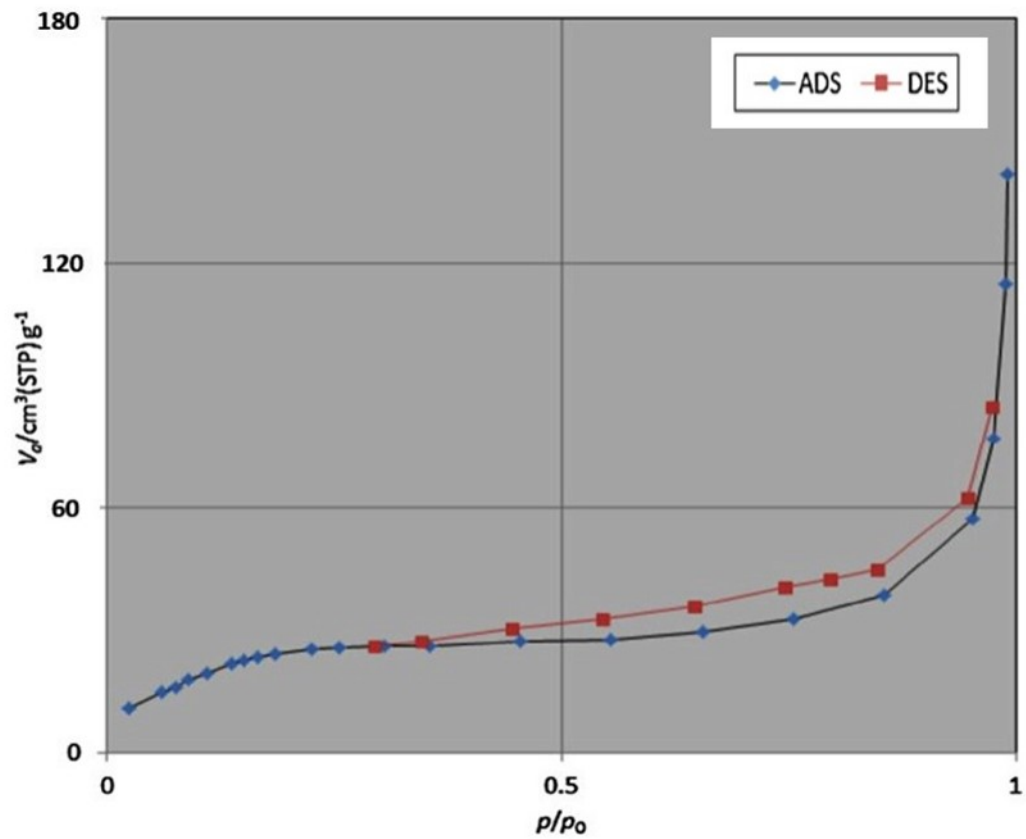

**Figure (S1)**  $\text{N}_2$  adsorption/desorption isotherm of GQDs@MI-SiNPs.

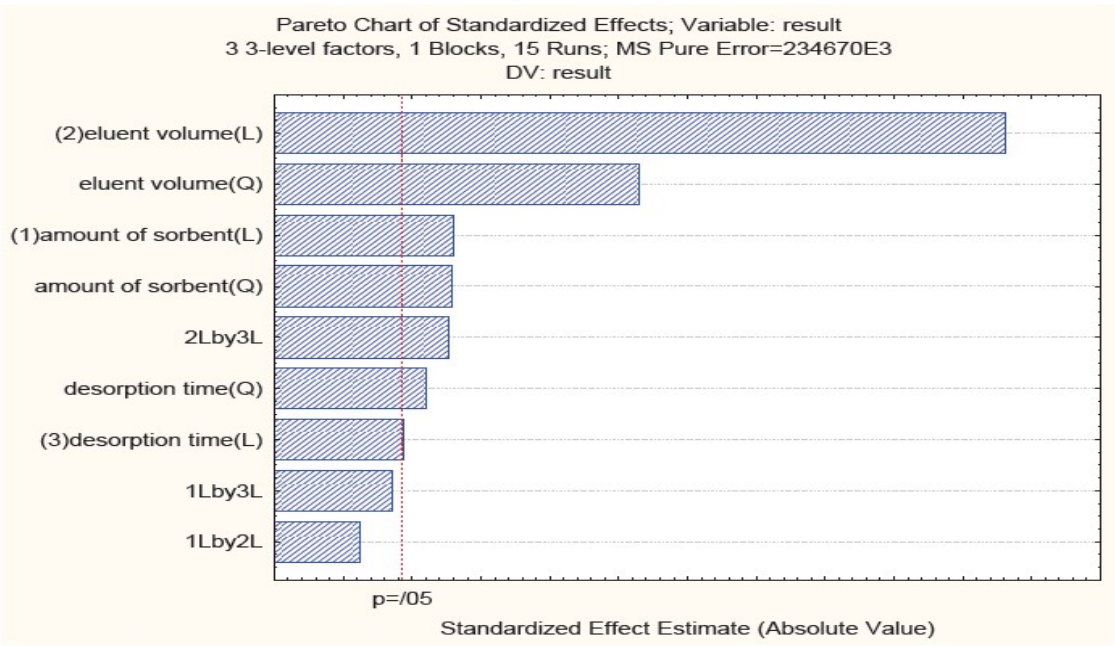

**Figure (S2)** Pareto chart of the main effects

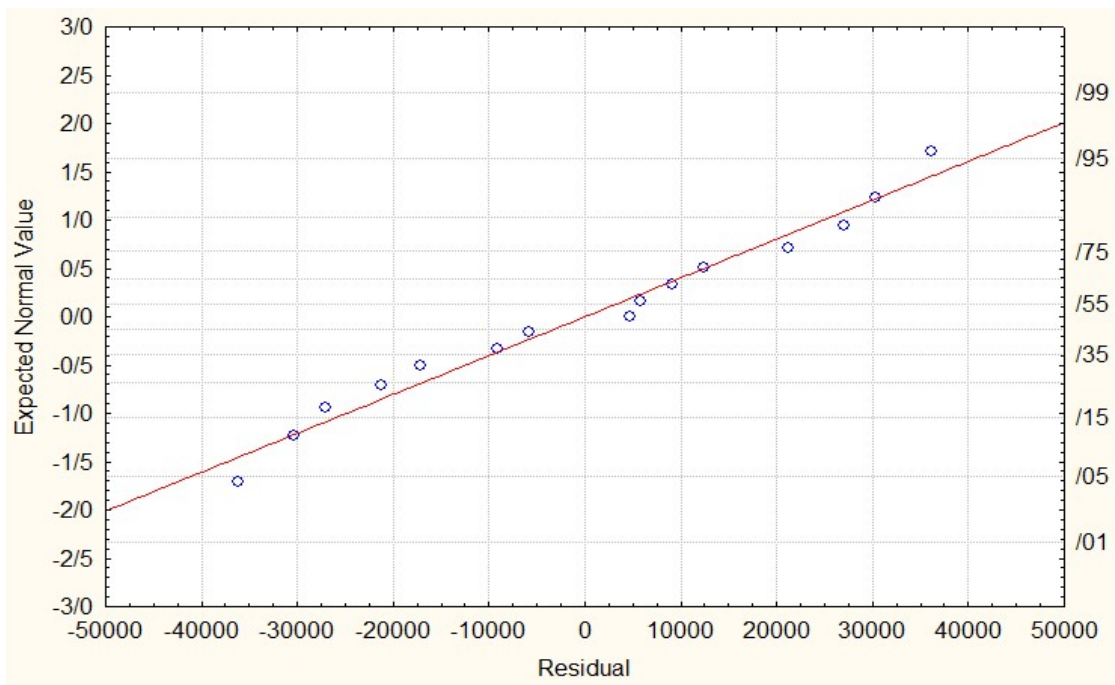

**Figure (S3)** Normal probability plot of residuals for the extraction of target analytes

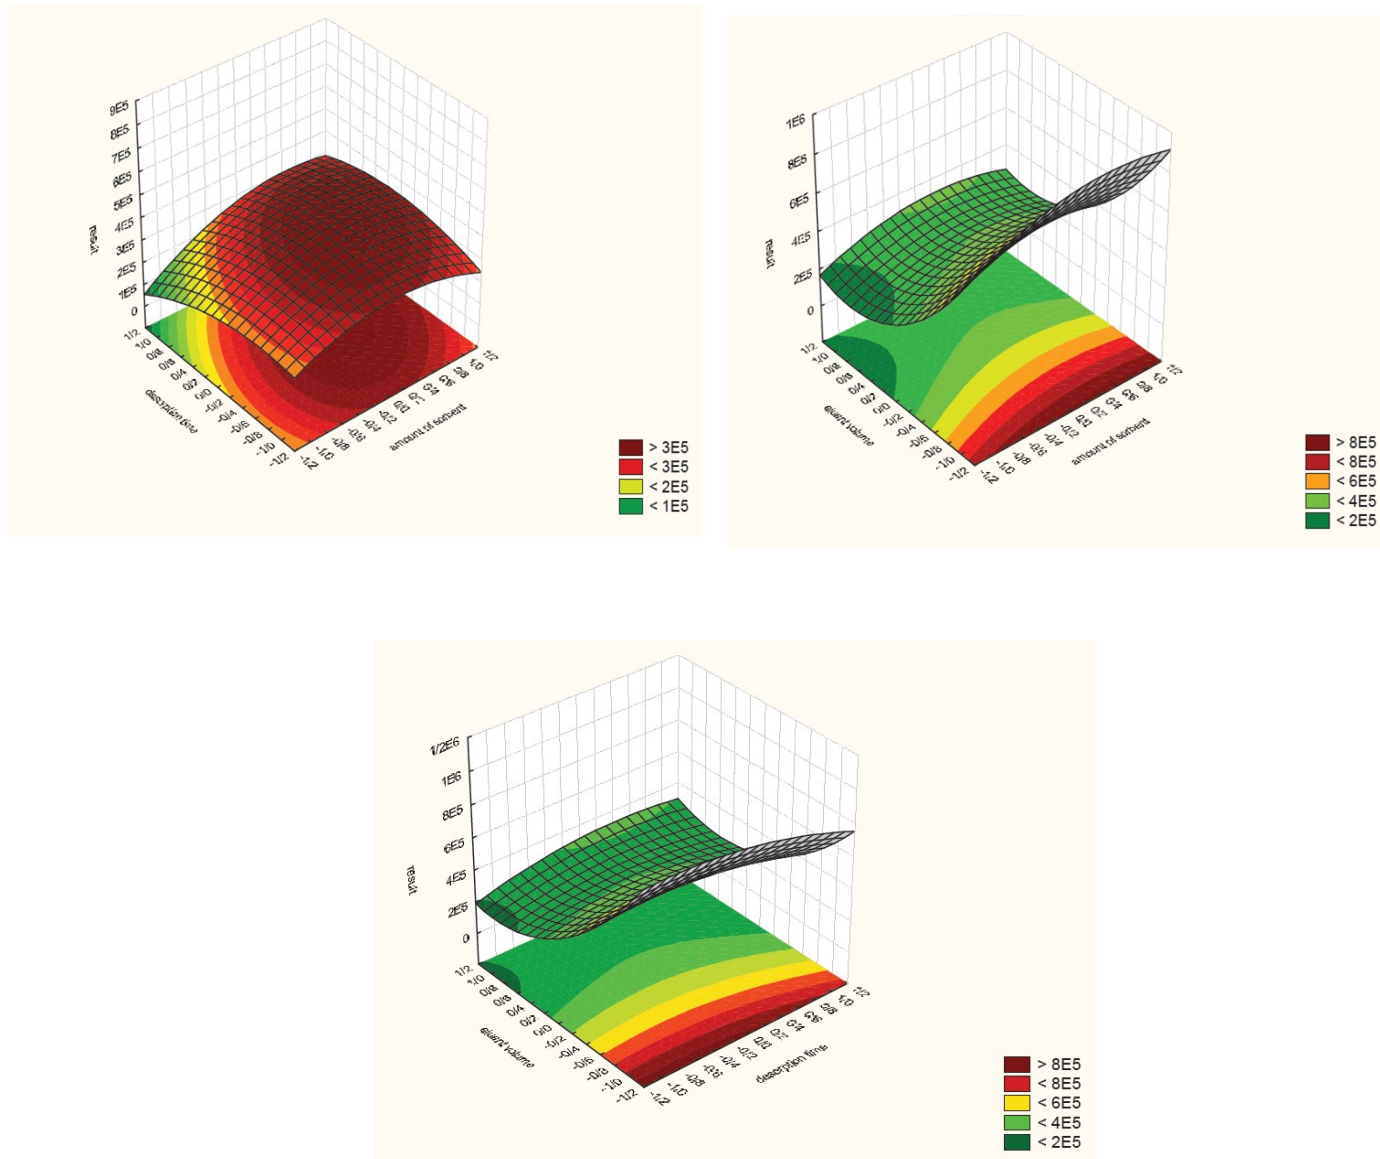

**Figure (S4)** 3D plots of significant factors (X<sub>1</sub>: amount of sorbent (mg), X<sub>2</sub>: eluent volume (μL), and X<sub>3</sub>: desorption time (min)).

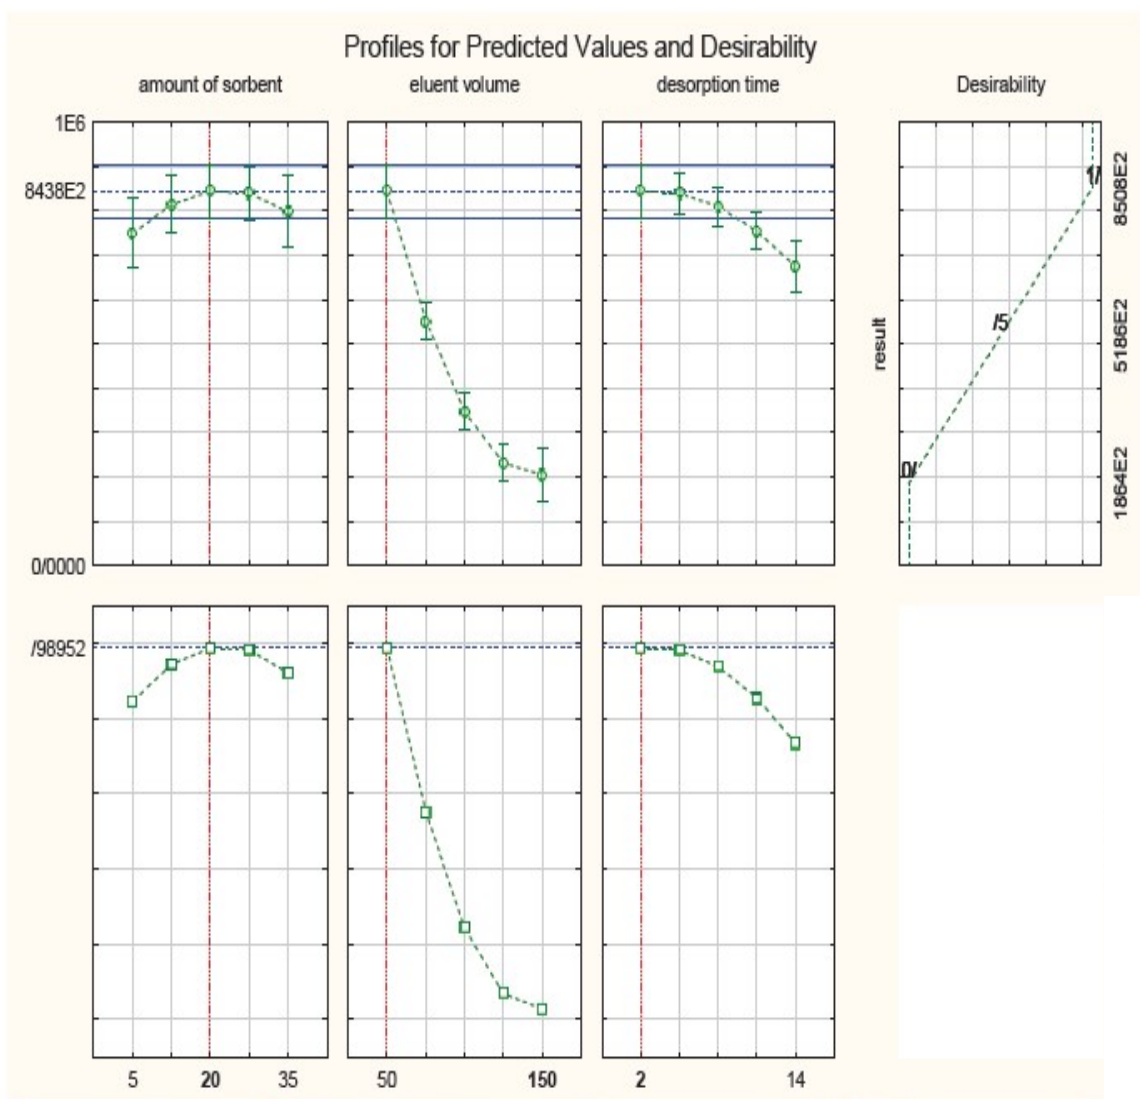

**Figure (S5)** Profiles for predicted values and desirability function.

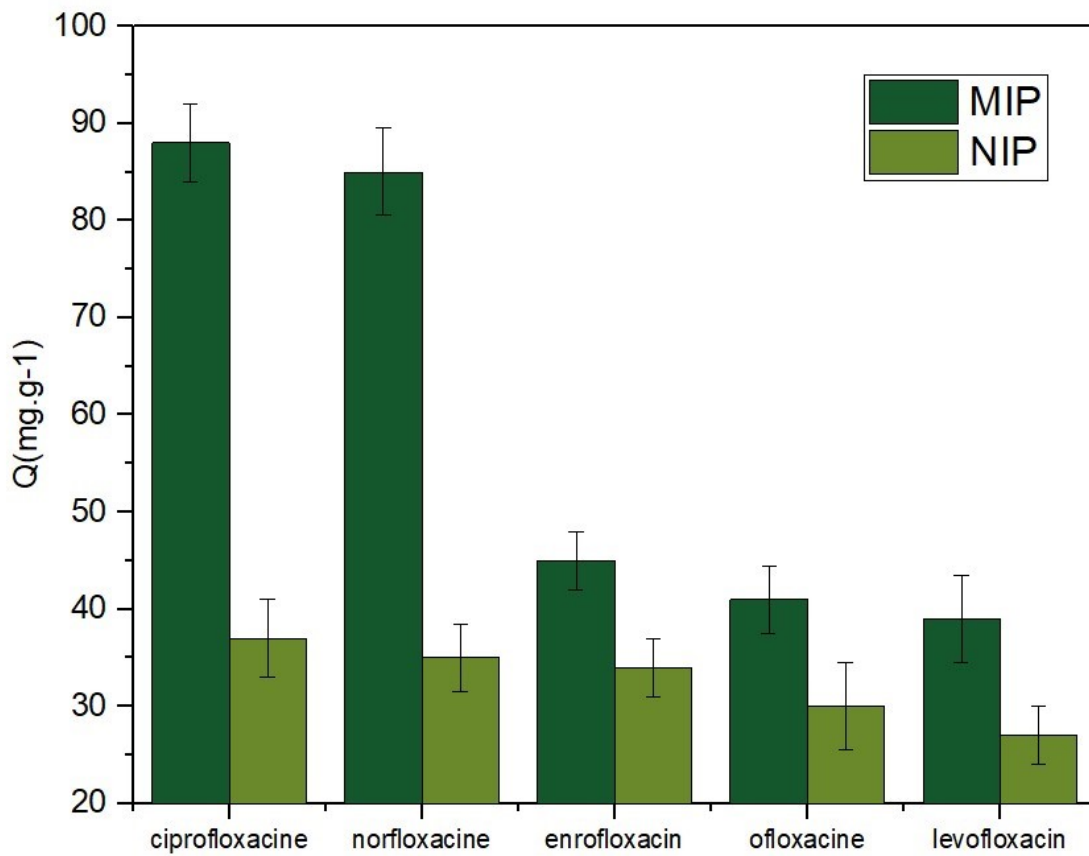

**Figure (S6)** Selectivity of GQDs@MI-SiNPs and GQDs@NI-SiNPs

**Table S1** Factors, actual and coded levels, and design matrix used in BBD for the extraction of CIP and NOR.

| Factors                                  | Levels         |                |                |                   |
|------------------------------------------|----------------|----------------|----------------|-------------------|
|                                          | Low (-1)       | Central (0)    | High (+1)      |                   |
| (X <sub>1</sub> ) amount of sorbent (mg) | 5              | 20             | 35             |                   |
| (X <sub>2</sub> ) eluent volume (μL)     | 50             | 100            | 150            |                   |
| (X <sub>3</sub> ) desorption time (min)  | 2              | 8              | 14             |                   |
| Run                                      | X <sub>1</sub> | X <sub>2</sub> | X <sub>3</sub> | Average peak area |
| 1(CP) <sup>a</sup>                       | 0              | 0              | 0              | 388748            |
| 2                                        | 1              | -1             | 0              | 787790            |
| 3                                        | -1             | 1              | 0              | 186418            |
| 4                                        | -1             | 0              | -1             | 231744            |
| 5                                        | 1              | 0              | -1             | 298420            |
| 6                                        | 0              | 0              | 1              | 278023            |
| 7                                        | 1              | 0              | 1              | 351817            |
| 8                                        | 1              | 1              | 0              | 235044            |
| 9                                        | 0              | 1              | -1             | 225205            |
| 10                                       | 0              | -1             | 1              | 659422            |
| 11                                       | -1             | -1             | 0              | 700420            |
| 12(CP) <sup>a</sup>                      | 0              | 0              | 0              | 380953            |
| 13(CP) <sup>a</sup>                      | 0              | 0              | 0              | 359191            |
| 14                                       | 0              | 1              | 1              | 269429            |
| 15                                       | 0              | -1             | -1             | 850762            |

<sup>a</sup>Central point



**Table S2** ANOVA results obtained by BBD.

| Factors                        | Sum of Square<br>(SS) | Degree of Freedom<br>(DF) | Mean Square (MS) | F-value  | p-value  |
|--------------------------------|-----------------------|---------------------------|------------------|----------|----------|
| X <sub>1</sub> (L+Q)           | 2.984156E+10          | 2                         | 2.984156E+10     | 127.164  | 0.030743 |
| X <sub>2</sub> (L+Q)           | 6.497235 E+11         | 2                         | 6.497235 E+11    | 2768.672 | 0.002604 |
| X <sub>3</sub> (L+Q)           | 12.959636 E+09        | 2                         | 12.959636 E+09   | 55.225   | 0.075489 |
| X <sub>1</sub> ×X <sub>2</sub> | 5.049595 E+09         | 1                         | 5.049595 E+09    | 1.599    | 0.333431 |
| X <sub>1</sub> ×X <sub>3</sub> | 4.035426 E+07         | 1                         | 4.035426 E+07    | 12.455   | 0.71755  |
| X <sub>2</sub> ×X <sub>3</sub> | 1.163054 E+08         | 1                         | 1.163054 E+08    | 59.115   | 0.016499 |
| Lack of Fit                    | 2.500669 E+09         | 3                         | 1.616652 E+09    | 6.889    | 0.129386 |
| Pure Error                     | 6.627224 E+07         | 2                         | 2.346698 E+08    |          |          |
| Total SS                       | 5.06710 E+10          | 14                        |                  |          |          |
| R-squared                      | 0.9922                |                           |                  |          |          |
| R-adjusted                     | 0.9783                |                           |                  |          |          |

<sup>a</sup>L (linear); Q (quadratic)

**Table (S3)** Results from the determination of intra- and inter-day RSDs and accuracy.

| Analyte          | Linearity                           |                |                            | Precision (RSD%, n=3)                |             |             |            |            |             |
|------------------|-------------------------------------|----------------|----------------------------|--------------------------------------|-------------|-------------|------------|------------|-------------|
|                  | Linear range (µg. L <sup>-1</sup> ) | R <sup>2</sup> | LOD (µg. L <sup>-1</sup> ) | Intra-day                            |             |             | Inter-day  |            |             |
|                  |                                     |                |                            | Spiking level (µg. L <sup>-1</sup> ) |             |             |            |            |             |
|                  |                                     |                |                            | 10                                   | 50          | 200         | 10         | 50         | 200         |
| Recovery% (RSD%) |                                     |                |                            |                                      |             |             |            |            |             |
| <b>CIP</b>       | 0.5-300                             | 0.994          | 0.13                       | 97.8 (3.6)                           | 97.4 (4.1)  | 101.1 (3.8) | 99.3 (2.1) | 97.3 (3.3) | 102.6 (2.4) |
| <b>NOR</b>       | 0.5-300                             | 0.998          | 0.38                       | 98.1 (2.7)                           | 103.4 (3.9) | 96.5 (2.9)  | 98.7 (3.0) | 98.9 (2.8) | 97.8 (3.9)  |
